# Supplementary material
Source: Springer Nature journal article supplement (https://www.springermedizin.de/resource/supplementary/12874_2012_862_MOESM2_ESM.pdf/9433154)

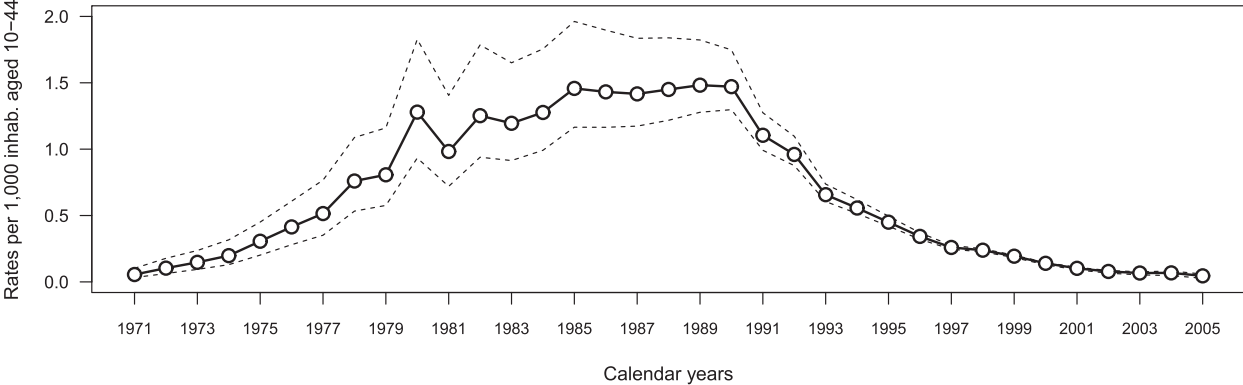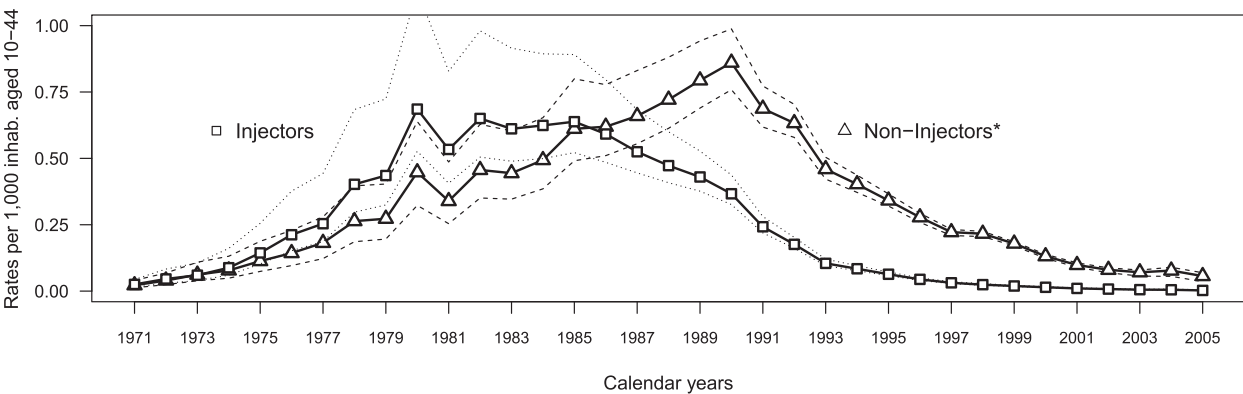

\* Non-injectors include mostly smoking and snorting

Supplement: MOESM2 [file 9433154]
